# Supplementary material for: New Evidence in the Booming Field of Online Mindfulness: An Updated Meta-analysis of Randomized Controlled Trials
Source: JMIR Ment Health. 2021 Jul 19;8(7):e28168. doi: 10.2196/28168 (PMC8329762; doi:10.2196/28168)
Supplement: Multimedia Appendix 1 [file mental_v8i7e28168_app1.docx]

Multimedia Appendix 1a*.* Characteristics of studies included in the meta-analysis

| First author (year) | Population, country | % Fa | Mean age (range or *SD*)b | Intervention (*n*) | Guidance (with/ without) | Delivery mode | *n* sessions, duration in weeks | Control group (*n*) | Measurementsc |
| --- | --- | --- | --- | --- | --- | --- | --- | --- | --- |
| Ahmad (2020) | University students, Canada | 75.2% | 24.8 (6.5) | MBI (35) | Without | Website | 12 sessions, 8 weeks | Waitlist (39) | Pre, mid, post (ITT) |
| Allexandre (2016) | Employees, US | 83.1% | 40.0 (12.8) | MBSR (33) | With (G) | Website | 8 sessions, 8 weeks | Waitlist (37) | Pre, post, 2-month FU (CAd) |
|  |  |  |  | MBSR (54) | Without | Website | 8 sessions, 8 weeks | Waitlist (37) | Pre, post, 2-month FU (CAd) |
| Aikens (2014)* | Employees, US | 50.0 | U (U) | MBSR (44) | With (G + I) | Website and virtual online classroom | 7 sessions, 7 weeks | Waitlist (45) | Pre, post (ITT) |
| Barrett (2020) | Social and healthcare workers, Ireland | 88% | 37.12 (12.18) | ACT (22) | Without | Website | 3 sessions, 2 weeks | CBT (20) | Pre, post (ITT) |
| Beshai (2020) | Distressed adults, US | 43.9% | 35.13 (10.57) | MBI (227) | Without | Website | 4 sessions, 4 weeks | Nature images (229) | Pre, post (ITT) |
| Boettcher (2014)* | Individuals with anxiety disorder, Sweden | 71.4 | 38 (10.3, 22-65) | MBI (45) | Without | Website | 8 sessions, 8 weeks | Online discussion forum (46) | Pre, post (ITT) |
| Bostock (2018) | Employees, UK | 59.2 | 35.5 (7.7, 23-61) | MBI (128) | Without | App | 45 sessions, 8 weeks | Waitlist (110) | Pre, post (CA) |
| Bruggeman-Everts (2017) | Severely fatigued cancer patients, the Netherlands | 73.7 | 54.8 (10.3) | MBCT (55) | With (I) | Website | 9 sessions, 9 weeks | Psycho-education (50) | Pre, post (ITT) |
|  |  |  |  |  |  |  |  | AAF (62) | Pre, post (ITT) |
| Buhrman (2013)* | Chronic pain patients, Sweden | 59.2 | 49.1 (10.3, 27-69) | ACT (38) | With (I) | Website | 7 sessions, 7 weeks | Online discussion forum (38) | Pre, post (ITT) |
| Cavalera (2018) | Multiple Sclerosis patients, Italy | 64.5 | 42.8 (8.7) | MBSR (69) | With (G) | Website | 8 sessions, 8 weeks | Online psycho-education (70) | Pre, post, 6-month FU (ITT) |
| Cavanagh (2013)* | Students, UK | 88.5 | 24.7 (6.4, 19-51) | MBI (54) | Without | Website | U, 2 weeks | Waitlist (50) | Pre, post (ITT) |
| Cavanagh (2018) | University students and staff, UK | 80.0 | 31.0 (18-68) | MBI (53) | Without | Website | 14 sessions,  2 weeks | Waitlist (50) | Pre, post (ITT) |
|  |  |  |  |  |  |  |  | Online psycho-education (52) | Pre, post (ITT) |
| Champion  (2018) | Employees, US | 59.7e | 39.4 (5.8, 25-59)e | MBI (38) | Without | App | 30 sessions,  4 weeks | Waitlist (36) | Pre, post (ITT) |
| Chapoutot (2020) | Adults with chronic insomnia or hypnotic dependence, France | 80% | 48 (10) | ACT (15) | With (I) | Videoconferencing | 4 sessions, 8 weeks | Waitlist (15) | Pre, post, 6-month FU (CA) |
| Compen (2018) | Distressed cancer patients, the Netherlands | 85.1 | 51.5 (10.4) | MBCT (90) | With (I) | Website | 8 sessions, 8 weeks | TAU (78) | Pre, post (ITT) |
| Cox (2018) | Intensive care unit patients treated for cardiorespiratory failure, US | 40.8 | 50.4 (14.4) | MBSR (31) | Without | App | 4 sessions, 4 weeks | Online psycho-education (18) | Pre, post, 2-month FU (CA) |
| De Wit (2020) | Partners of patients with ALS or PMA, The Netherlands | 64.9% | 62 (10,14) | ACT (74) | With (I) | Website | 7 sessions, 12 weeks | Waitlist (74) | Pre, post, 6-month FU (ITT) |
| Dowd (2015)* | Individuals with self-reported chronic pain, Ireland | 90.3 | 44.5 (12.3, 19-76) | MBCT (62) | Without | Website | 12 sessions, 6 weeks | Psycho-education (62) | Pre, post, 6-month FU (ITT) |
| El Morr (2020) | Students, Canada | 78.6% | 22.55 (6.1) | MBI (80) | Without | Website | 12 sessions, 8 weeks | Waitlist (80) | Pre, post (ITT) |
| Eriksson (2018) | Practising psychologists, Sweden | 96.0 | 36.2 (8.2, 24-57) | CBI (52) | Without | Website | 6 sessions, 6 weeks | Waitlist (49) | Pre, post (CAd) |
| Eustis (2018) | Students, US | 78.8 | 25.4 (7.9) | ABI (78) | With (I) | Website | 3 sessions, 4 weeks | Waitlist (78) | Pre, post, 1-month FU (CA) |
| Flett (2018) | Students, New Zealand | 70.2 | 20.1 (2.9, 18-49) | MBI (72) | Without | App (Headspace) | 10 sessions, 10 days | Evernote app (75) | Pre, post, 1-month FU (CA) |
|  |  |  |  | MBI (63) | Without | App (Smiling Mind) | 10 sessions, 10 days | Evernote app (75) | Pre, post, 1-month FU (CA) |
| Forbes (2020) | Women with chronic pelvic pain, UK | 100% | U (U) | MBI (31) | Without | App | 60 sessions, 8.5 weeks | Muscle relaxation (30) | Pre, post, 1-month FU, 4-month FU (ITT) |
|  |  |  |  | MBI (31) | Without | App | 60 sessions, 8.5 weeks | TAU (29) | Pre, post, 1-month FU, 4-month FU (ITT) |
| Gaigg (2020) | Adults with autism, UK | 82,1% | 41.71 (11.01) | MBCT (19) | Without | Website | 10 sessions, 8 weeks | CBT (16) | Pre, post, 2.5-month and 5-month FU (CA) |
|  |  |  | 44.09 (11.93) | MBCT (19) | Without | Website | 10 sessions, 8 weeks | WLC (19) | Pre, post, 2.5-month and 5-month FU (CA) |
| Gao (2021) | Adults with sleep-interfering worry, US | 80,3% | 41 (18) | MBI (36) | Without | App | 30 sessions, 8 weeks | TAU (35) | Pre, mid, post, 3-month FU (ITT) |
| Garrison (2018) | Smokers seeking to quit, US | 71.7 | U (U) | MBI + online ES (245) | Without | App | 22 sessions, 22 days | Online ES (260) | Pre, post (CA) |
| Gili (2020) | Mild and moderate depressed patients, Spain | 77.8 | 45.3 (12.6) | MBI + TAU (54) | Without | Website | 4 sessions, 8 weeks | TAU (57) | Pre, post, 6-month FU, 12-month FU (ITT) |
|  |  |  |  |  |  |  |  | TAU + online psycho-education (54) | Pre, post, 6-month FU, 12-month FU (ITT) |
|  |  |  |  |  |  |  |  | TAU + online positive affect intervention (56) | Pre, post, 6-month FU, 12-month FU (ITT) |
| Glück (2011)* | Students and employees, Austria/ Switzerland | 73.5 | 35.2 (20-73) | MBSR (28) | Without | Website | 2 sessions, 2 weeks | Waitlist (21) | Pre, post (ITT) |
| Gu (2018) | University students and staff, UK | 72.9 | 24.2 (18-49) | MBI (83) | Without | Website | U, 2 weeks | Waitlist (63) | Pre, post (CA) |
|  |  |  |  |  |  |  |  | Online classical music (68) | Pre, post (CA) |
| Hearn (2018) | Spinal cord injury patients, UK | 54.0 | 44.4 (10.4) | MBI (36) | Without | Website | 8 sessions, 8 weeks | Psycho-education (31) | Pre, post, 3-month FU (CA) |
| Hearn (2019) | Family caregivers of people with spinal cord injuries or chronic neuropathic pain, UK | 47.3 | 44.0 (11.1) | MBI (28) | Without | Website | 8 sessions, 8 weeks | Psycho-education (27) | Pre, post, 3-month FU (CA) |
| Henriksson (2016) | Chronic pain patients, Sweden | 93.5 | 51.0 (9.3) | MBSR (55) | Without | Website | 8 sessions, 8 weeks | Online discussion forum (52) | Pre, post (CA) |
| Hesser (2012)* | Tinnitus patients, Sweden | 43.4 | 48.5 (14.7, 20-78) | ACT (35) | With (I) | Website | 8 sessions, 8 weeks | Online discussion forum (32) | Pre, post (CAd) |
|  |  |  |  |  |  |  |  | Online CBT (32) | Pre, post, 10-month FU (CAd) |
| Hoffmann (2020) | Adults with severe health anxiety, Denmark | 65,3% | 39.59 (9.93) | ACT (53) | With (I) | Web app | 7 sessions, 12 weeks | Discussion forum (48) | Pre, mid, post, 6-month FU (ITT) |
| Howells (2016) | General population, Australia, US, Poland, UK, Malta, Ireland, Switzerland, Sweden, New Zealand, Singapore | 88.1 | 40.7 (10.6) | MBI (97) | Without | App | 10 sessions, 10 days | Online neutral task (97) | Pre, post (CA) |
| Huberty (2019) | Students, US | 89.8d | 21.2 (4.9) | MBI (56) | Without | App | 7 sessions, 8 weeks | Waitlist (53) | Pre, post, 1-month FU (CA) |
| Ivtzan (2018) | General population, UK | 80.7 | 39.8 (15.4) | MBI (33) | Without | Website | 8 sessions, 8 weeks | Waitlist (29) | Pre, post (ITT) |
|  | General population, China | 58.5 | 24.4 (8.6) | MBI (27) | Without | Website | 8 sessions, 8 weeks | Waitlist (26) | Pre, post (ITT) |
| Jelinek (2020) | Adults with depressive symptoms, Germany | 82.6% | 45.41 (10.55) | MBCT (32) | Without | Website | 14 sessions, 2 weeks | Behavioural activiation (37) | Pre, post, 1-month FU (ITT) |
|  |  |  | 46.42 (10.28) | MBSR (32) | Without | Website | 14 sessions, 2 weeks | TAU (35) | Pre, post, 1-month FU (ITT) |
| Khazaeili (2019) | Caregivers of women with MS, Iran | U | U (U) | MBI (15) | With (U) | App | 8 sessions, 8 weeks | No intervention (15) | Pre, post, 1-month FU (U) |
| Kladnitski (2020) | Adults with an anxiety or depressive disorder, Australia | 84,8% | U (U) | MBI (40) | With (I) | Website | 6 sessions, 14 weeks | TAU (39) | Pre, mid, post, 3-month FU (ITT) |
|  |  |  |  | MBI (40) | With (I) | Website | 6 sessions, 14 weeks | CBT (39) | Pre, mid, post, 3-month FU (ITT) |
|  |  | U | U (U) | MBCT (40) | With (I) | Website |  | TAU (39) | Pre, mid, post, 3-month FU (ITT) |
|  |  |  |  | MBI (40) | With (I) | Website | 6 sessions, 14 weeks | CBT (39) |  |
| Krieger (2019) | Individuals with high self-criticism, Switzerland | 77.7 | 37.7 (11.5) | MBCL (59) | With (I)f | Website | 7 sessions, 8 weeks | Waitlist (62) | Pre, post (ITT) |
| Köhle (2021) | Partners of cancer patients, the Netherlands | 70.4 | 55.9 (10.7, 27-82) | ACT + self-compassion (67) | With (I) | Website | 8 sessions, 12 weeks | Waitlist (66) | Pre, post (ITT) |
|  |  |  |  | ACT + self-compassion (70) | Withoutg | Website | 8 sessions, 12 weeks | Waitlist (66) | Pre, post (ITT) |
| Krusche (2018) | Pregnant women, UK | 100 | 32.7 (22-40)e | MBI (107) | Without | Website | 10 sessions, 4 weeks | Waitlist (78) | Pre, post (CA) |
| Kubo (2019) | Cancer patients, US | 68.0 | 58.1 (14.4) | MBI (54) | Without | App | U, 8 weeks | Waitlist (43) | Pre, post (CA) |
|  | Caregivers of cancer patients, US | 58.1 | 57.6 (17.7) | MBI (17) | Without | App | U, 8 weeks | Waitlist (14) | Pre, post (CA) |
| Kubo (2020) | Adults with cancer, US | 69,9% | 66.5 (9.6) | MBI (52) | Without | App | 42 sessions, 6 weeks | WLC (51) | Pre, post, 1.5-month FU (CA) |
|  | Informal caregivers of adults with cancer, US | 79% | 62.4 (13.4) | MBI (22) |  |  |  | WLC (17) |  |
| Kvillemo (2016) | Students, Sweden | 57.9 | 26.2 (5.8) | MBSR (40) | Without | Website | 8 sessions, 8 weeks | Online expressive writing (36) | Pre, post (ITT) |
| Lappalainen (2015) | Individuals depressive symptoms, Finland | 71.8 | 51.9 (12.9) | ACT (19) | With (I) | Website | 6 sessions, 7 weeks | Waitlist (20) | Pre, post (ITT) |
| Lee (2018) | Healthcare providers, Korea | 100 | 35.4 (7.2)e | MBI (19) | Without | Website | 20 sessions, 4 weeks | Waitlist (18) | Pre, post (CA) |
| Levin (2014)* | Students, US | 53.9 | 18.4 (0.5, 18-20) | ACT (37) | Without | Website | 2 sessions, 3 weeks | Waitlist (39) | Pre, post (ITT) |
| Levin (2016) | Undergraduate university students, US | 76.9 | 21.6 (5.5, 18-58) | ACT (110) | Without | Website | 2 sessions, 3 weeks | Online psycho-education (118) | Pre, post, 1-month and 3-month FU (ITT) |
| Levin (2017) | College students, US | 66.0 | 20.5 (2.7) | ACT (40) | Without | Website | 6 sessions, 4 weeks | Waitlist (39) | Pre, post (ITT) |
| Levin (2019) | Community sample, US | 68.1 | 21.9 (5.5, 18-46) | ACT + online experience sampling (23) | Without | App – tailored modules | 4 sessions, 4 weeks | Online experience sampling (24) | Pre, post (ITT) |
|  |  |  |  | ACT + online experience sampling (22) | Without | App – random modules | 4 sessions, 4 weeks | Online experience sampling (24) | Pre, post (ITT) |
| Levin (2020) | University students, US | 100% | 20.43 (2.47) | MBI (10) | Without | App | 28 sessions, 4 weeks | WLC (13) | Pre, mid, post (CA) |
| Levin (2020) | University students, US | 72.4% | 22.27 (5.08) | ACT (45) | With (I) | Website | 12 sessions, 6 weeks | WLC (45) | Pre, post, 2-month FU (ITT) |
| Lilly (2019) | Emergency medical dispatchers, US and Canada | 81.9 | U (U) | MBSR (163) | Without | Website | 7 sessions, 7 weeks | Waitlist (160) | Pre, post, 3-month FU (ITTh) |
| Lin (2017) | Individuals with self-reported chronic pain, Germany | 84.1 | 51.7 (13.1) | ACT (100) | With (I) | Website | 7 sessions, 7 weeks | Waitlist (101) | Pre, post, 4-month FU (ITT) |
|  |  |  |  | ACT (101) | Without | Website | 7 sessions, 7 weeks | Waitlist (101) | Pre, post, 4-month FU (ITT) |
| Ly (2014)* | MDD patients, Sweden | 70.4 | 36.0 (10.8, 20-61) | MBCT (41) | With (I) | App | U, 8 weeks | BA treatment (40) | Pre, post, 4-month FU (ITT) |
| Ma (2018) | Community sample, China | 57.9 | 27.8 (7.9, 18-47) | MBCT + online group discussion sessions (48) | Without | Website | 8 sessions, 8 weeks | Online discussion forum (48) | Pre, post (CA) |
|  |  |  |  |  |  |  |  | No intervention (48) | Pre, post (CA) |
|  |  |  |  | MBCT (48) | Without | Website | 8 sessions, 8 weeks | Online discussion forum (48) | Pre, post (CA) |
|  |  |  |  |  |  |  |  | No intervention (48) | Pre, post (CA) |
| Mak (2015)* | Students and employees, China | 66.3 | 22.8 (6.5, 17-53) | MBSR (107) | Without | Website | 8 sessions, 8 weeks | Waitlist (107) | Pre, post, 1-month FU (ITT) |
|  |  |  |  | MBSR-HAPA (107) | Without | Website | 8 sessions, 8 weeks | Waitlist (107) | Pre, post, 1-month FU (ITT) |
| Mak (2017) | Students and employees, China | 74.3 | 32.6 (12.5) | MBSR (604) | Without | Website | 8 sessions, 8 weeks | Online CBT (651) | Pre, post, 3-month FU (ITT) |
| Mak (2018) | General population, China | 72.9 | 33.6 (12.1, 18-83) | MBSR (703) | Without | App and website | 28 sessions, 4 weeks | Online cognitive behavioural psycho-education (753) | Pre, post, 3-month FU (ITT) |
|  |  |  |  | CBI (705) | Without | App and website | 28 sessions, 4 weeks | Online cognitive behavioural psycho-education (753) | Pre, post, 3-month FU (ITT) |
| Messer (2019) | Cancer survivors, US | 70% | 51.0 (10.58) | MBSR (11) | Without | Website | 6 weeks, 6 sessions | TAU (10) | Pre, post (ITT) |
| Milbury (2020) | Adults with brain cancer, US | 46% | 57.49 ( 31-75) | MBI (18) | Without | Videoconferencing | 4 weeks, 4 sessions | TAU (17) | Pre, post, 2-month FU (ITT) |
| Molander (2018) | Individuals with hearing loss, Sweden | 67.2 | 58.7 (12.8, 25-83) | ACT (31) | With (I) | Website | 8 sessions, 8 weeks | Waitlist (30) | Pre, post (ITT) |
| Morledge (2013)* | Community sample, US | 88.9 | U | MBSR (184) | With (G) | Website | 8 sessions, 8 weeks | Waitlist (184) | Pre, post, 1-month FU (ITT) |
|  |  |  |  | MBSR (183) | Without | Website | 8 sessions, 8 weeks | Waitlist (184) | Pre, post, 1-month FU (ITT) |
| Nadler (2020) | Adult employees, US | 73.5% | u (range 18-60+) | MBI (37) | Without | Website | 8 weeks, 8 sessions | WLC (65) | Pre, post (CA) |
| Nguyen-Feng (2016) | Students, US | 66.5 | U | MBI + Present control (102) | Without | Website | 3 sessions, 4 weeks | Online present control (99) | Pre, post (ITT) |
| Nguyen-Feng (2017) | Psychology students, US | 66.0 | U | MBI (122) | Without | Website | 6 sessions, 4 weeks | Online psycho-education (122) | Pre, post, 1-month FU (CA) |
| Nissen (2020) | Cancer survivors with depressive or anxious symptoms, Denmark | 91.33% | 55.45 (9.94) | MBI (104) | Without | Website | 8 weeks, 8 sessions | WLC (46) | Pre, mid, post, 6-month FU (ITT) |
| Noone (2018) | Students, Ireland | 75.8 | 20.9 (4.4) | MBI (43) | Without | App | 30 sessions, 6 weeks | Online guided breathing exercises (48) | Pre, post (ITT) |
| O'Driscoll (2019) | Pharmacy students, Ireland | 76.9% | U (U) | MBI (19) | Without | Website | 4 weeks, 4 sessions | WLC (33) | Pre, post (CA) |
| Potharst (2019) | Mothers with elevated parental stress, The Netherlands | 100% | 36.22 (3.86) | MBI (37) | Without | Website | 8 weeks, 8 sessions | WLC (30) | Pre, post, 2.5-month FU (ITT) |
| Pots (2016)* | Individuals with mild to moderate depressive symptoms, the Netherlands | 75.8 | 46.9 (12.1, 20-73) | ACT (82) | With (I) | Website | 9 sessions, 12 weeks | Waitlist (87) | Pre, post, 3-month FU (ITT) |
|  |  |  |  |  |  |  |  | Online expressive writing (67) | Pre, post, 3-month FU (ITT) |
| Puzia (2020) | Adults with myeloproliferative neoplasm, US | 76.3% | U (U) | MBI (28) | Without | App | 28 sessions, 4 weeks | Educational information (51) | Pre, post (CA) |
| Querstret (2017, 2018) | Employees, UK | 80.5 | 40.7 (10.5, 21-62) | MBI (60) | Without | Website | 10 sessions, 4 weeks | Waitlist (58) | Pre, post, (ITT) |
| Räsänen (2016) | Students, Finland | 85.3 | 24.3 (3.3) | ACT (33) | With (I) | Website | 7 sessions, 7 weeks | Waitlist (35) | Pre, post, 12-month FU (ITT) |
| Ritvo (2020) | University students, Canada | 76% | 23.10 (8.09) | MBI (76) | Without | Website | 12 sessions, 8 weeks | WLC (78) | Pre, post (ITT) |
| Rosen (2018) | Breast cancer patients, US | 100 | 52.3 (10.3, 29-73) | MBI (57) | Without | App | 10 sessions, 8 weeks | Waitlist (55) | Pre, post, 1-month FU (CAd) |
| Russell (2018) | Melanoma patients, Australia | 53.6 | 53.4 (13.1) | MBI (46) | Without | Website | 6 sessions, 6 weeks | TAU (23) | Pre, post (CA) |
| Sagon (2018) | Students, US | 71.8 | 18.2 (0.4) | ABI (52) | Without | Website | U, 8 weeks | Waitlist (51) | Pre, post (ITT) |
| Sairanen (2019) | Parents of children with type 1 diabetes with burnout symptoms, Sweden | 81,1% | 42.62 (6.96) | ACT (37) | With (I) | Website | 5 sessions, 10 weeks | WLC (37) | Pre, post 4-month FU (CA) |
| Scott (2018) | Chronic pain patients, UK | 63.5 | 45.5 (14.0) | TAU + ACT (31) | With (I) | Website | 8 sessions, 12 weeks | TAU (32) | Pre, post, 6-month FU (ITT) |
| Segal (2020) | Adults with residual depressive symptoms, US | 75.6% | 48.3 (14.9) | MBCT (230) | With (I) | Website | 8 sessions, 12 weeks | TAU (230) | Pre, post, 12-month FU (ITT) |
| Shore (2018) | Community sample, UK | 89.0 | 32.2 (13.6, 18-67) | MBI (56) | Without | Website | 6 sessions, 2 weeks | Waitlist (54) | Pre, post (CA) |
| Simister (2018) | Fibromyalgia patients, Canada | 95.0 | 39.7 (9.4, 18-64) | TAU + ACT (33) | Without | Website | 7 sessions, 8 weeks | TAU (34) | Pre, post, 3-month FU (ITT) |
| Stjernswärd (2017) | Caregivers of patients with a mental illness, Sweden | 88.1 | 54.0 (40-69) | MBSR (78) | Without | Website | 8 sessions, 10 weeks | Waitlist (73) | Pre, post (CA) |
| Tighe (2017) | Indigenous people, Australia | 63.9 | 26.3 (8.1, 18-56) | ACT (31) | Without | App | 3 sessions, 6 weeks | Waitlist (30) | Pre, post (ITT) |
| Trompetter (2014)* | Individuals with self reported chronic pain, the Netherlands | 76.0 | 52.8 (20-84) | ACT (82) | With (I) | Website | 9 sessions, 12 weeks | Waitlist (77) | Pre, post, 3-month FU (ITT) |
|  |  |  |  |  |  |  |  | Online expressive writing (79) | Pre, post, 3-month FU (ITT) |
| Van Emmerik (2018) | Community sample, the Netherlands | 96.0 | 44.7 (9.8, 19-73) | MBSR (191) | Without | App | 5 sessions, 5 weeks | Waitlist (186) | Pre, post(ITT) |
| Viskovich (2019) | University students, Australia | 63.9% | 26.85 (8.77) | ACT (596) | Without | Website | 4 sessions, 4 weeks | WLC (566) | Pre, post. 2.5-month FU (ITT) |
| Wahbeh (2016) | Older adults, US | 50.0 | 76.2 (7.4) | MBI (8) | With (I) | Website | 6 sessions, 6 weeks | Online health education (8) | Pre, post (CA) |
| Wahbeh (2018) | Older adults with depressive symptoms, US | 80.0 | 64.8 (6.2) | MBI (26) | With (I) | Website | 6 sessions, 6 weeks | Waitlist (24) | Pre, post (CA) |
| Walsh (2019) | Students, Canada | 83.7 | 20.0 (2.5) | MBI (58) | Without | App | U, 3 weeks | Cognitive training app (50) | Pre, post (CA) |
| Wolever (2012)* | Employees, US | 77.2 | 43.0 (U) | MBSR (52) | With (G) | Virtual online classroom | 12 sessions, 12 weeks | No intervention (53) | Pre, post (ITT) |
|  |  |  |  |  |  |  |  | Yoga (90)i | Pre, post (ITT) |
| Yang (2018) | Medical students, US | 63.6 | 25.1 (21-47) | MBI (45) | Without | App | 30 sessions, 4 weeks | Waitlist (43) | Pre, post, 1-month FU (CA) |
| Yang (2019) | Pregnant women depressive or anxiety symptoms, China | 100 | 30.8 (4.5) | MBSR (62) | With (I) | App | 4 sessions, 8 weeks | TAU (61) | Pre, post (ITT) |
| Zernicke (2014)* | Cancer recovery patients, Canada | 72.6 | 58.0 (29-79) | MBSR (30) | With (G) | Virtual online classroom | 8 sessions, 8 weeks | Waitlist (32) | Pre, post (ITT) |

*Note*. AAF, Ambulant Activity Feedback; ABI, Acceptance-Based Intervention; ACT, Acceptance and Commitment Therapy; BA, Behavioural Activation; CBT, Cognitive Behavioural Therapy; CBI, Compassion-Based Intervention; ES, experience sampling; F, female; FU, follow-up; G, group-based; HAPA, Health Action Process Approach; I, individual; ITT, intention-to-treat; MBCL, Mindfulness-Based Compassionate Living; MBCT, Mindfulness-Based Cognitive Therapy; MBI, Mindfulness-Based Intervention; MBSR, Mindfulness-Based Stress Reduction; MDD, Major Depressive Disorder; SD, standard deviation; TAU, treatment as usual; U, unknown; UK, United Kingdom; US, United States.

a% female of the total study population at baseline.

bMean age (*SD* and/or range) of the total study population at baseline. If Means and SDs are reported for experimental and control conditions separately, weighted means and SDs are calculated by the authors.

cWe solely report measurements that were used in the meta-analysis. Follow-up times are since post-intervention.

dCompleter data distracted from paper is used in meta-analysis, actual analyses in paper are ITT.

eBased on completers data only.

fGuidance was only provided upon request.

gThis condition received the intervention with automated feedback, but no therapist support was offered.
hITT data on all participants that completed at least one survey (excluding 2 participants after randomisation).

iThis comparison is not included in our analyses due to lack of data.

*Studies included in the meta-analysis of Spijkerman et al. (2016).

Multimedia Appendix 1b*.* Outcome measures used in studies included in the meta-analysis

| First author (year) | Outcome measuresa | | | | |
| --- | --- | --- | --- | --- | --- |
|  | Depression | Anxiety | Stress | Well-being | Mindfulness |
| Ahmad (2020) | PHQ-9 | BAI | PSS | - | FFMQ-SF |
| Allexandre (2016) | - | - | PSS | SF-36-EW | MAAS |
|  | - | - | PSS | SF-36-EW | MAAS |
| Aikens (2014)* | - | - | PSS | - | FFMQ |
| Barrett (2020) | - | - | PSS | - | - |
| Beshai (2020) | PHQ-9 | GAD-7 | PSS | - | FFMQ-15 |
| Boettcher (2014)* | BDI-II | BAI | - | QOLI | - |
| Bostock (2018) | HADS-D | HADS-A | - | WEMWBS | - |
| Bruggeman-Everts (2017) | - | - | - | PANAS-PA | - |
|  | - | - | - | PANAS-PA | - |
| Buhrman (2013)* | HADS-D | HADS-A | - | QOLI | - |
| Cavalera (2018) | HADS-D | HADS-A | - | - | - |
| Cavanagh (2013)* |  | - | PSS | - | FFMQ |
| Cavanagh (2018) |  | - | PSS | - | FFMQ |
|  |  | - | PSS | - | FFMQ |
| Champion  (2018) | - | - | PSS | SWLS | - |
| Chapoutot (2020) | - | - | - | - | MAAS |
| Compen (2018) | HADS-D | HADS-A | - | MHC-SF | FFMQ-SF |
| Cox (2018) | PHQ-9 | GAD-7 | - | - | CAMS-R |
| De Wit (2020) | HADS-D | HADS-A | - | - | - |
| Dowd (2015)* | HADS-D | HADS-A | - | SWLS | MAAS |
| El Morr (2020) | PHQ-9 | BAI | PSS | - | FFMQ-SF |
| Eriksson (2018) | - | - | PSS | - | FFMQ |
| Eustis (2018) | DASS-D | DASS-A | DASS-S | QOLI | - |
| Flett (2018) | CES-D | HADS-A | PSS | FS | CAMS-R |
|  | CES-D | HADS-A | PSS | FS | CAMS-R |
| Forbes (2020) | HADS-D | HADS-A | - | - | CAMS-R |
|  | HADS-D | HADS-A | - | - | CAMS-R |
| Gaigg (2020) | HADS-D | GAD-7 | - | - | FFMQ-NR |
|  | HADS-D | GAD-7 | - | - | FFMQ-NR |
| Gao (2021) | - | GAD-7 | - | - | FFMQ |
| Garrison (2018) | - | - | - | - | FFMQ |
| Gili (2020) | PHQ-9 | - | - | PANAS-PA | - |
|  | PHQ-9 | - | - | PANAS-PA | - |
|  | PHQ-9 | - | - | PANAS-PA | - |
| Glück (2011)* | - | - | PSQ | - | FMI |
| Gu (2018) | - | - | PSS | - | FFMQ |
|  | - | - | PSS | - | FFMQ |
| Hearn (2018) | HADS-D | HADS-A | - | - | FFMQ |
| Hearn (2019) | HADS-D | HADS-A | - | - | FFMQ |
| Henriksson (2016) | - | - | - | LiSat-11 | FFMQ |
| Hesser (2012)* | HADS-D | HADS-A | PSS | QOLI | - |
|  | HADS-D | HADS-A | PSS | QOLI | - |
| Hoffmann (2020) | SCL92-D | SCL92-A | - | - | - |
| Howells (2016) | CES-D | - | - | FS, PANAS-PA, SWLS | - |
| Huberty (2019) | - | - | PSS | - | FFMQ |
| Ivtzan (2018) | - | - | - | PANAS-PA, MLQ-P | FMI-SF |
|  | - | - | - | PANAS-PA, MLQ-P | FMI-SF |
| Jelinek (2020) | PHQ-9 | - | - | - | KIMS |
|  | PHQ-9 | - | - | - | KIMS |
| Khazaeili (2019) | BDI-II | BAI-II | - | - | FFMQ |
| Kladnitski (2020) | PHQ-9 | GAD-7 | K-10 | - | - |
|  | PHQ-9 | GAD-7 | K-10 | - | - |
|  | PHQ-9 | GAD-7 | K-10 | - | - |
|  |  |  |  |  |  |
| Krieger (2019) | DASS-D | DASS-A | DASS-S | SWLS | CHIME |
| Köhle (2021) | HADS-D | HADS-A | - | MHC-SF | - |
|  | HADS-D | HADS-A | - | MHC-SF | - |
| Krusche (2018) | EPDS | GAD-7 | PSS | - | FFMQ |
| Kubo (2019) | HADS-D | HADS-A | - | FACT-G | FFMQ-SF |
|  | HADS-D | HADS-A | - | - | FFMQ-SF |
| Kubo (2020) | HADS-D | HADS-A | NCCNDT | - | FFMQ‐SF |
|  |  |  |  |  |  |
| Kvillemo (2016) | CES-D | - | - | PWBS | - |
| Lappalainen (2015) | BDI-II | - | - | - | FFMQ |
| Lee (2018) | - | - | - | PANAS-PA | - |
| Levin (2014)* | DASS-D | DASS-A | DASS-S | - | - |
| Levin (2016) | DASS-D | DASS-A | DASS-S | MHC-SF | FFMQ |
| Levin (2017) | CCAPS-34-D | CCAPS-34-A | - | MHC-SF | - |
| Levin (2019) | DASS-D | DASS-A | DASS-S | MHC-SF | - |
|  | DASS-D | DASS-A | DASS-S | MHC-SF | - |
| Levin (2020) | CCAPS-D | CCAPS-A | CCAPS-S | MHC-SF | FFMQ |
| Levin (2020) | CCAPS-D | CCAPS-A | CCAPS-S | MHC-SF | - |
| Lilly (2019) | - | - | C-SOSI | - | MAAS |
| Lin (2017) | PHQ-9 | GAD-7 | - | - | - |
|  | PHQ-9 | GAD-7 | - | - | - |
| Ly (2014)* | BDI-II | BAI | - | QOLI | - |
| Ma (2018) | SDS | SAS | - | - | FFMQ |
|  | SDS | SAS | - | - | FFMQ |
|  | SDS | SAS | - | - | FFMQ |
|  | SDS | SAS | - | - | FFMQ |
| Mak (2015)* | DASS-D | DASS-A | PSS | SWLS, WBI | FFMQ |
|  | DASS-D | DASS-A | PSS | SWLS, WBI | FFMQ |
| Mak (2017) | MHI-D | MHI-A | - | SWLS, WBI | - |
| Mak (2018) | - | - | - | WBI | MAAS |
|  | - | - | - | WBI | MAAS |
| Messer (2019) | HADS-D | HADS-A | - | - | - |
| Milbury (2020) | CES-D | - | - | - | MAAS |
| Molander (2018) | PHQ-9 | GAD-7 | - | QOLI | - |
| Morledge (2013)* | - | - | PSS | - | MAAS |
|  | - | - | PSS | - | MAAS |
| Nadler (2020) | - | - | PSS | - | FFMQ-SF |
| Nguyen-Feng (2016) | DASS-D | DASS-A | PSS | - | - |
| Nguyen-Feng (2017) | DASS-D | DASS-A | PSS | - | - |
| Nissen (2020) | BDI-II | STAI-Y | PSS | WHO-5 | - |
| Noone (2018) | - | - | - | WEMWBS, PANAS-PA | FFMQ |
| O'Driscoll (2019) | - | - | PSS | - | FFMQ |
| Potharst (2019) | PHQ-4-D | PHQ-4-A | - | - | - |
| Pots (2016)* | CES-D | HADS-A | - | MHC-SF | FFMQ-SF |
|  | CES-D | HADS-A | - | MHC-SF | FFMQ-SF |
| Puzia (2020) | PROMIS-D | PROMIS-A | - | - | - |
| Querstret (2017, 2018) | PHQ-9 | GAD-7 | PSS | - | FFMQ |
| Räsänen (2016) | DASS-D | DASS-A | PSS | MHC-SF | FFMQ |
| Ritvo (2020) | PHQ-9 | BAI | PSS | - | FFMQ-SF |
| Rosen (2018) | - | - | - | - | MAAS |
| Russell (2018) | - | - | PSS | - | CAMS-R |
| Sagon (2018) | DASS-D | DASS-A | DASS-S | - | - |
| Sairanen (2019) | DASS-D | DASS-A | DASS-S | - | FFMQ |
| Scott (2018) | PHQ-9 | - | - | - | - |
| Segal (2020) | PHQ-9 | GAD-7 | - | - | - |
| Shore (2018) | - | - | - | - | FFMQ |
| Simister (2018) | CES-D | - | - | - | FFMQ |
| Stjernswärd (2017) | - | - | PSS | - | FFMQ |
| Tighe (2017) | PHQ-9 | - | - | - | - |
| Trompetter (2014)* | HADS-D | HADS-A | - | MHC-SF | FFMQ-SF |
|  | HADS-D | HADS-A | - | MHC-SF | FFMQ-SF |
| Van Emmerik (2018) | - | - | - | - | FFMQ |
| Viskovich (2019) | DASS-D | DASS-A | DASS-S | MHC-SF, SWLS | - |
| Wahbeh (2016) | CES-D | - | PSS | PANAS-PA | FFMQ |
| Wahbeh (2018) | CES-D | - | PSS | - | - |
| Walsh (2019) | - | - | PSS | - | - |
| Wolever (2012)* | CES-D | - | PSS | - | CAMS-R |
|  | CES-D | - | PSS | - | CAMS-R |
| Yang (2018) | - | - | PSS | GWBS | - |
| Yang (2019) | PHQ-9 | GAD-7 | - | - | FFMQ |
| Zernicke (2014)* | POMS-D | POMS-A | CSOSI | - | FFMQ |

*Note*.  BAI, Beck Anxiety Inventory; BDI-II, Beck Depression Inventory-II; CBT; CAMS-R, Cognitive and Affective Mindfulness Scale-Revised; CCAPS-34-A, Counseling Center Assessment of Psychological Symptoms – 34 – Anxiety subscale; CCAPS-34-D, Counseling Center Assessment of Psychological Symptoms – 34 – Depression subscale; CES-D, Center for Epidemiological Studies Depression Scale; CHIME, Comprehensive Inventory of Mindfulness Experience; CSOSI, Calgary Symptoms of Stress Inventory; DASS-A, Depression Anxiety and Stress Scale – Anxiety subscale; DASS-D, Depression Anxiety and Stress Scale – Depression subscale; DASS-S, Depression Anxiety and Stress Scale – Stress subscale; EPDS, Edinburgh Postnatal Depression Scale; F, female; FACT-G, Functional Assessment of Cancer Therapy – General Scale; FFMQ, Five Facet Mindfulness Questionnaire; FFMQ-SF, Five Facet Mindfulness Questionnaire – Short Form; FMI, Freiburg Mindfulness Inventory; FS, Flourishing Scale; GAD-7, Generalized Anxiety Disorder – 7; GWBS, General Well-Being Schedule; HADS-A, Hospital Anxiety and Depression Scale – Anxiety subscale; HADS-D, Hospital Anxiety and Depression Scale – Depression subscale; HAPA, Health Action Process Approach; LiSat-11, Life Satisfaction Questionnaire –11; MAAS, Mindful Attention Awareness Scale; MHC-SF, Mental Health Continuum-Short Form; MHI-A, Mental Health Inventory – Anxiety subscale; MHI-D, Mental Health Inventory – Depression subscale; MLQ-P, Meaning in Life Questionnaire – Presence subscale; PANAS-PA, Positive and Negative Affect Scale – Positive Affect subscale; PHQ-9, Patient Health Questionnaire - Depression Scale; PHQ-4-A, Patient Health Questionnaire - Anxiety subscale; PHQ-4-D, Patient Health Questionnaire - Depression subscale; POMS-A, Profile of Mood States – Anxiety Subscale; POMS-D, Profile of Mood States – Depression Subscale; PSS, Perceived Stress Scale; PSQ, Perceived Stress Questionnaire; PWBS, Psychological Well-Being Scale; QOLI, Quality of Life Inventory; SAS, Self-Rating Anxiety Scale; SDS, Self-Rating Depression Scale; SF-36-EW, RAND Corporation’s Medical Outcomes Study Short Form – 36 – Emotional Well-Being subscale; SWLS, Satisfaction With Life Scale; WBI, Well-Being Index; WEMWBS, Warwick Edinburgh Mental Well-Being Scale.

aWe solely report outcome measures that were used in the meta-analysis.

*Studies included in the meta-analysis of Spijkerman et al. (2016).
